# Supplementary material
Source: PubMed Central journal article supplement (PMC7375908)
Supplement: NIHMS1545934-supplement-1.pdf [file NIHMS1545934-supplement-1.pdf]

| Change in score               | 6 months            |                    | 12 months           |                    |
|-------------------------------|---------------------|--------------------|---------------------|--------------------|
|                               | ESC+MEM<br>(n=11)   | ESC+MEM<br>(n=11)  | ESC+MEM<br>(n=8)    | ESC+MEM<br>(n=8)   |
| HAM-D                         | -13 (-17 - -2)      | -13 (-17 - -2)     | -13 (-16 – 1)       | -13.5 (-16 - -12)  |
| Delayed recall (Z-scores)     | 0.19 (-.79 - .74)   | 0.06 (-1.1 - .91)  | 0.08 (-.37-.93)     | -0.38 (-.85 - .35) |
| Executive function (Z-scores) | -0.09 (-.57 – 1.02) | -0.14 (-.75 - .67) | -0.005 (-.55 - .73) | .14 (-1.42 - .48)  |

**Supplementary Table 1.** Change in clinical and cognitive scores from baseline to 6 and 12 months (medians and ranges).
